# Supplementary material
Source: ML conference proceedings conference paper supplement (https://openaccess.thecvf.com/content/ICCV2023/html/Hakim_ClusT3_Information_Invariant_ICCV_2023_paper.html)
Supplement: Supplementary file 1 [file Hakim_ClusT3_Information_Invariant_ICCV_2023_supplemental.pdf]

# ClusT3: Information Invariant Test-Time Training – Supplementary Material

Gustavo A. Vargas Hakim\* , David Osowiechi\* ,  
Mehrdad Noori , Milad Cheraghalikhani , Ali Bahri , Ismail Ben Ayed , and Christian Desrosiers

LIVIA, ÉTS Montréal, Canada

## 1. Results on CIFAR-10-C [2] dataset for corruption levels 1 to 4

As shown in Tables 1, 2, 3 and 4, ClusT3 performs well on the different corruptions at different levels. It achieves a higher accuracy than ResNet50 for all corruptions, and a higher mean accuracy than all other TTA/TTT approaches. While TTT [5] yields competitive performance, our method achieves a mean accuracy improvement of at least 2% compared to this approach, on all corruption levels.

## 2. Hyperparameters search on VisDA-C

We perform the hyperparameter search to find an efficient configuration for VisDA-C. We evaluate to up to 20 iterations, using all the different individual layers, as well as combinations of them. Specifically, we tested the following settings:

- A single normal projector (one  $1 \times 1$  convolution) in Table 5;
- Five normal projectors in Table 6;
- Ten normal projectors in Table 7;
- A single Large projector (two  $1 \times 1$  convolutions with ReLU in between) in Table 8;
- Five Large projectors in Table 9.

As observed in these results, our ClusT3 method obtains significant improvements in different settings. For this dataset, the best accuracy is achieved using a single large projector applied to the second layer.

## References

- [1] Malik Boudiaf, Romain Mueller, Ismail Ben Ayed, and Luca Bertinetto. Parameter-free online test-time adaptation. In *IEEE/CVF Conference on Computer Vision and Pattern Recognition (CVPR)*, pages 8344–8353, 2022.

---

\*Equal contribution. Correspondence to gustavo-adolfo.vargas-hakim.1@ens.etsmtl.ca, david.osowiechi.1@ens.etsmtl.ca

- [2] Dan Hendrycks and Thomas Dietterich. Benchmarking neural network robustness to common corruptions and perturbations. 2019.
- [3] Yuejiang Liu, Parth Kothari, Bastien van Delft, Baptiste Bellot-Gurlet, Taylor Mordan, and Alexandre Alahi. Ttt++: When does self-supervised test-time training fail or thrive? *Neural Information Processing Systems (NeurIPS)*, 2021.
- [4] Zachary Nado, Shreyas Padhy, D. Sculley, Alexander D’Amour, Balaji Lakshminarayanan, and Jasper Snoek. Evaluating prediction-time batch normalization for robustness under covariate shift. *arXiv:2006.10963 [cs, stat]*, Jan. 2021. arXiv: 2006.10963.
- [5] Yu Sun, Xiaolong Wang, Zhuang Liu, John Miller, Alexei A. Efros, and Moritz Hardt. Test-time training with self-supervision for generalization under distribution shifts. In *International Conference on Machine Learning (ICML)*, 2020.
- [6] Dequan Wang, Evan Shelhamer, Shaoteng Liu, Bruno Olshausen, and Trevor Darrell. Tent: Fully test-time adaptation by entropy minimization. 2021.

|                   | ResNet50 | LAME [1] | PTBN [4]         | TENT [6]         | TTT [5]                           | TTT++ [3]        | ClusT3-H15                        |
|-------------------|----------|----------|------------------|------------------|-----------------------------------|------------------|-----------------------------------|
| Gaussian Noise    | 28.02    | 26.08    | 61.39 $\pm$ 0.10 | 61.19 $\pm$ 0.26 | 70.63 $\pm$ 0.04                  | 78.70 $\pm$ 4.28 | <b>79.14 <math>\pm</math>0.03</b> |
| Shot noise        | 38.33    | 37.13    | 66.57 $\pm$ 0.06 | 66.2 $\pm$ 0.18  | 75.18 $\pm$ 0.04                  | 80.12 $\pm$ 0.12 | <b>81.51 <math>\pm</math>0.15</b> |
| Impulse Noise     | 46.12    | 45.01    | 63.56 $\pm$ 0.20 | 62.98 $\pm$ 0.19 | 65.91 $\pm$ 0.04                  | 70.64 $\pm$ 0.53 | <b>76.95 <math>\pm</math>0.07</b> |
| Defocus blur      | 67.33    | 67.65    | 85.48 $\pm$ 0.12 | 85.32 $\pm$ 0.18 | <b>91.95 <math>\pm</math>0.02</b> | 81.75 $\pm$ 0.43 | 90.33 $\pm$ 0.09                  |
| Glass blur        | 34.42    | 32.73    | 52.26 $\pm$ 0.04 | 52.08 $\pm$ 0.15 | 60.44 $\pm$ 0.05                  | 62.85 $\pm$ 0.50 | <b>71.09 <math>\pm</math>0.17</b> |
| Motion blur       | 63.71    | 64.09    | 80.78 $\pm$ 0.12 | 80.75 $\pm$ 0.09 | 86.29 $\pm$ 0.10                  | 68.42 $\pm$ 1.08 | <b>87.87 <math>\pm</math>0.11</b> |
| Zoom blur         | 61.27    | 61.99    | 83.33 $\pm$ 0.11 | 83.28 $\pm$ 0.10 | <b>89.90 <math>\pm</math>0.04</b> | 70.74 $\pm$ 2.05 | 88.86 $\pm$ 0.04                  |
| Snow              | 72.15    | 72.13    | 73.25 $\pm$ 0.16 | 73.17 $\pm$ 0.25 | 81.25 $\pm$ 0.02                  | 52.43 $\pm$ 0.56 | <b>84.30 <math>\pm</math>0.07</b> |
| Frost             | 62.27    | 61.70    | 73.41 $\pm$ 0.22 | 73.54 $\pm$ 0.16 | 83.83 $\pm$ 0.04                  | 52.80 $\pm$ 2.67 | <b>87.17 <math>\pm</math>0.07</b> |
| Fog               | 81.86    | 81.94    | 83.88 $\pm$ 0.06 | 83.81 $\pm$ 0.09 | <b>90.62 <math>\pm</math>0.05</b> | 41.75 $\pm$ 0.09 | 90.03 $\pm$ 0.02                  |
| Brightness        | 87.58    | 87.71    | 86.81 $\pm$ 0.05 | 86.81 $\pm$ 0.23 | 92.87 $\pm$ 0.09                  | 50.95 $\pm$ 2.19 | <b>92.99 <math>\pm</math>0.06</b> |
| Contrast          | 68.62    | 68.85    | 84.16 $\pm$ 0.09 | 84.23 $\pm$ 0.29 | 90.94 $\pm$ 0.07                  | 45.28 $\pm$ 0.55 | <b>89.24 <math>\pm</math>0.07</b> |
| Elastic transform | 67.84    | 68.25    | 76.44 $\pm$ 0.18 | 76.21 $\pm$ 0.08 | 84.03 $\pm$ 0.11                  | 35.53 $\pm$ 1.51 | <b>86.74 <math>\pm</math>0.04</b> |
| Pixelate          | 56.3     | 55.83    | 76.34 $\pm$ 0.10 | 76.40 $\pm$ 0.16 | 84.92 $\pm$ 0.15                  | 33.64 $\pm$ 0.83 | <b>87.93 <math>\pm</math>0.03</b> |
| JPEG compression  | 70.62    | 70.37    | 69.64 $\pm$ 0.03 | 69.54 $\pm$ 0.05 | 76.46 $\pm$ 0.04                  | 28.01 $\pm$ 1.75 | <b>85.11 <math>\pm</math>0.06</b> |
| Average           | 60.43    | 60.10    | 74.48            | 74.37            | 81.68                             | 56.91            | <b>85.28</b>                      |

Table 1. Accuracy (%) on CIFAR-10-C dataset with Level 4 corruption for ClusT3-15 compared to ResNet50, LAME, PTBN, TENT, TTT, and TTT++.

|                   | ResNet50 | LAME [1] | PTBN [4]         | TENT [6]         | TTT [5]                           | TTT++ [3]        | ClusT3-H15                        |
|-------------------|----------|----------|------------------|------------------|-----------------------------------|------------------|-----------------------------------|
| Gaussian Noise    | 33.99    | 32.58    | 64.55 $\pm$ 0.13 | 64.67 $\pm$ 0.17 | 74.10 $\pm$ 0.09                  | 80.29 $\pm$ 0.81 | <b>81.55 <math>\pm</math>0.09</b> |
| Shot noise        | 46.35    | 45.88    | 69.82 $\pm$ 0.08 | 70.04 $\pm$ 0.14 | 78.43 $\pm$ 0.07                  | 82.46 $\pm$ 0.37 | <b>84.12 <math>\pm</math>0.02</b> |
| Impulse Noise     | 59.90    | 59.61    | 72.08 $\pm$ 0.14 | 71.95 $\pm$ 0.33 | 76.32 $\pm$ 0.10                  | 79.20 $\pm$ 0.38 | <b>83.75 <math>\pm</math>0.01</b> |
| Defocus blur      | 79.29    | 79.58    | 87.62 $\pm$ 0.17 | 87.39 $\pm$ 0.05 | <b>93.25 <math>\pm</math>0.06</b> | 87.68 $\pm$ 0.38 | 91.74 $\pm$ 0.07                  |
| Glass blur        | 47.29    | 46.44    | 63.29 $\pm$ 0.11 | 63.26 $\pm$ 0.21 | 72.09 $\pm$ 0.11                  | 72.52 $\pm$ 0.56 | <b>79.78 <math>\pm</math>0.02</b> |
| Motion blur       | 63.42    | 63.72    | 81.13 $\pm$ 0.13 | 80.99 $\pm$ 0.08 | 86.48 $\pm$ 0.09                  | 69.59 $\pm$ 1.38 | <b>88.02 <math>\pm</math>0.10</b> |
| Zoom blur         | 67.86    | 68.36    | 84.57 $\pm$ 0.11 | 84.34 $\pm$ 0.06 | <b>91.00 <math>\pm</math>0.02</b> | 73.23 $\pm$ 2.33 | 89.90 $\pm$ 0.07                  |
| Snow              | 74.93    | 74.67    | 75.08 $\pm$ 0.14 | 75.14 $\pm$ 0.19 | 83.90 $\pm$ 0.07                  | 57.96 $\pm$ 1.02 | <b>86.22 <math>\pm</math>0.07</b> |
| Frost             | 64.54    | 64.05    | 74.15 $\pm$ 0.04 | 73.98 $\pm$ 0.14 | 84.13 $\pm$ 0.10                  | 49.94 $\pm$ 3.53 | <b>87.37 <math>\pm</math>0.07</b> |
| Fog               | 85.73    | 85.95    | 86.57 $\pm$ 0.09 | 86.38 $\pm$ 0.15 | <b>92.19 <math>\pm</math>0.08</b> | 52.89 $\pm$ 4.13 | 91.83 $\pm$ 0.01                  |
| Brightness        | 88.93    | 88.75    | 87.50 $\pm$ 0.19 | 87.44 $\pm$ 0.01 | <b>93.53 <math>\pm</math>0.09</b> | 57.96 $\pm$ 1.32 | 93.31 $\pm$ 0.04                  |
| Contrast          | 79.66    | 79.83    | 85.63 $\pm$ 0.05 | 85.46 $\pm$ 0.08 | <b>91.85 <math>\pm</math>0.09</b> | 53.44 $\pm$ 2.37 | 90.83 $\pm$ 0.05                  |
| Elastic transform | 75.67    | 75.79    | 82.72 $\pm$ 0.14 | 82.56 $\pm$ 0.15 | <b>90.09 <math>\pm</math>0.10</b> | 36.49 $\pm$ 3.72 | 89.33 $\pm$ 0.11                  |
| Pixelate          | 74.83    | 75.07    | 82.17 $\pm$ 0.14 | 81.91 $\pm$ 0.13 | 89.30 $\pm$ 0.10                  | 33.41 $\pm$ 3.02 | <b>90.23 <math>\pm</math>0.06</b> |
| JPEG compression  | 73.70    | 73.51    | 71.54 $\pm$ 0.09 | 71.54 $\pm$ 0.15 | 78.95 $\pm$ 0.09                  | 28.82 $\pm$ 2.74 | <b>86.55 <math>\pm</math>0.06</b> |
| Average           | 67.74    | 67.59    | 77.89            | 77.80            | 85.04                             | 61.06            | <b>87.64</b>                      |

Table 2. Accuracy (%) on CIFAR-10-C dataset with Level 3 corruption for ClusT3-15 compared to ResNet50, LAME, PTBN, TENT, TTT, and TTT++.

|                   | ResNet50 | LAME [1] | PTBN [4]         | TENT [6]         | TTT [5]                           | TTT++ [3]        | ClusT3-H15                        |
|-------------------|----------|----------|------------------|------------------|-----------------------------------|------------------|-----------------------------------|
| Gaussian Noise    | 50.53    | 49.99    | 71.31 $\pm$ 0.16 | 71.43 $\pm$ 0.08 | 81.18 $\pm$ 0.11                  | 85.41 $\pm$ 2.26 | <b>86.07 <math>\pm</math>0.08</b> |
| Shot noise        | 69.27    | 69.47    | 78.97 $\pm$ 0.19 | 79.02 $\pm$ 0.17 | 87.54 $\pm$ 0.10                  | 88.79 $\pm$ 0.44 | <b>89.77 <math>\pm</math>0.04</b> |
| Impulse Noise     | 68.57    | 68.69    | 77.09 $\pm$ 0.13 | 77.03 $\pm$ 0.15 | 82.20 $\pm$ 0.13                  | 84.27 $\pm$ 0.29 | <b>86.60 <math>\pm</math>0.03</b> |
| Defocus blur      | 87.45    | 87.47    | 88.20 $\pm$ 0.11 | 88.06 $\pm$ 0.06 | <b>93.67 <math>\pm</math>0.06</b> | 90.85 $\pm$ 0.42 | 92.87 $\pm$ 0.01                  |
| Glass blur        | 43.26    | 42.01    | 62.66 $\pm$ 0.09 | 62.55 $\pm$ 0.11 | 71.33 $\pm$ 0.04                  | 71.60 $\pm$ 1.95 | <b>78.81 <math>\pm</math>0.11</b> |
| Motion blur       | 72.98    | 73.11    | 83.51 $\pm$ 0.16 | 83.46 $\pm$ 0.10 | 89.57 $\pm$ 0.07                  | 77.38 $\pm$ 1.12 | <b>89.78 <math>\pm</math>0.13</b> |
| Zoom blur         | 74.89    | 75.24    | 85.81 $\pm$ 0.21 | 85.79 $\pm$ 0.05 | <b>92.05 <math>\pm</math>0.10</b> | 80.30 $\pm$ 1.45 | 90.82 $\pm$ 0.04                  |
| Snow              | 71.11    | 70.74    | 74.73 $\pm$ 0.11 | 74.69 $\pm$ 0.22 | 82.96 $\pm$ 0.08                  | 68.56 $\pm$ 1.36 | <b>86.30 <math>\pm</math>0.04</b> |
| Frost             | 76.67    | 76.56    | 79.54 $\pm$ 0.15 | 79.41 $\pm$ 0.27 | 87.67 $\pm$ 0.03                  | 63.66 $\pm$ 3.39 | <b>90.27 <math>\pm</math>0.10</b> |
| Fog               | 88.51    | 88.47    | 87.62 $\pm$ 0.10 | 87.60 $\pm$ 0.17 | <b>93.23 <math>\pm</math>0.04</b> | 64.26 $\pm$ 3.37 | 93.07 $\pm$ 0.04                  |
| Brightness        | 89.75    | 89.57    | 88.09 $\pm$ 0.03 | 87.97 $\pm$ 0.14 | <b>93.69 <math>\pm</math>0.08</b> | 67.19 $\pm$ 1.23 | 93.64 $\pm$ 0.01                  |
| Contrast          | 84.58    | 84.79    | 86.19 $\pm$ 0.17 | 86.41 $\pm$ 0.04 | <b>92.50 <math>\pm</math>0.12</b> | 62.90 $\pm$ 1.93 | 92.00 $\pm$ 0.01                  |
| Elastic transform | 82.10    | 82.26    | 83.69 $\pm$ 0.13 | 83.68 $\pm$ 0.08 | <b>90.98 <math>\pm</math>0.12</b> | 50.06 $\pm$ 2.37 | 90.37 $\pm$ 0.01                  |
| Pixelate          | 81.04    | 80.94    | 82.92 $\pm$ 0.14 | 83.01 $\pm$ 0.07 | 90.61 $\pm$ 0.15                  | 43.33 $\pm$ 3.31 | <b>91.28 <math>\pm</math>0.09</b> |
| JPEG compression  | 76.06    | 76.04    | 73.63 $\pm$ 0.02 | 73.56 $\pm$ 0.13 | 81.37 $\pm$ 0.11                  | 28.26 $\pm$ 2.78 | <b>87.86 <math>\pm</math>0.08</b> |
| Average           | 74.45    | 74.36    | 80.26            | 80.24            | 87.37                             | 68.45            | <b>89.30</b>                      |

Table 3. Accuracy (%) on CIFAR-10-C dataset with Level 2 corruption for ClusT3-15 compared to ResNet50, LAME, PTBN, TENT, TTT, and TTT++.

|                   | ResNet50 | LAME [1] | PTBN [4]         | TENT [6]         | TTT [5]                           | TTT++ [3]        | ClusT3-H15                        |
|-------------------|----------|----------|------------------|------------------|-----------------------------------|------------------|-----------------------------------|
| Gaussian Noise    | 71.38    | 71.54    | 79.22 $\pm$ 0.13 | 79.52 $\pm$ 0.12 | 88.38 $\pm$ 0.12                  | 90.14 $\pm$ 1.05 | <b>90.35 <math>\pm</math>0.05</b> |
| Shot noise        | 80.39    | 80.44    | 82.21 $\pm$ 0.05 | 82.18 $\pm$ 0.15 | 90.43 $\pm$ 0.02                  | 90.89 $\pm$ 0.29 | <b>91.42 <math>\pm</math>0.02</b> |
| Impulse Noise     | 80.04    | 80.05    | 82.39 $\pm$ 0.08 | 82.48 $\pm$ 0.15 | 88.23 $\pm$ 0.02                  | 87.76 $\pm$ 0.06 | <b>90.51 <math>\pm</math>0.06</b> |
| Defocus blur      | 90.17    | 89.96    | 88.28 $\pm$ 0.04 | 88.26 $\pm$ 0.15 | <b>93.89 <math>\pm</math>0.04</b> | 91.51 $\pm$ 0.48 | 93.72 $\pm$ 0.09                  |
| Glass blur        | 40.96    | 39.79    | 63.19 $\pm$ 0.05 | 63.22 $\pm$ 0.15 | 71.12 $\pm$ 0.07                  | 72.12 $\pm$ 2.13 | <b>790.1 <math>\pm</math>0.21</b> |
| Motion blur       | 82.78    | 82.75    | 85.99 $\pm$ 0.09 | 85.89 $\pm$ 0.08 | <b>91.97 <math>\pm</math>0.05</b> | 84.11 $\pm$ 0.91 | 91.50 $\pm$ 0.13                  |
| Zoom blur         | 78.58    | 78.90    | 86.19 $\pm$ 0.06 | 86.23 $\pm$ 0.04 | <b>92.21 <math>\pm</math>0.08</b> | 81.76 $\pm$ 1.38 | 90.87 $\pm$ 0.04                  |
| Snow              | 83.45    | 83.33    | 82.94 $\pm$ 0.13 | 82.84 $\pm$ 0.35 | 88.90 $\pm$ 0.04                  | 75.89 $\pm$ 0.75 | <b>90.33 <math>\pm</math>0.02</b> |
| Frost             | 84.84    | 84.48    | 83.88 $\pm$ 0.15 | 83.71 $\pm$ 0.24 | 91.17 $\pm$ 0.03                  | 71.54 $\pm$ 3.13 | <b>92.19 <math>\pm</math>0.06</b> |
| Fog               | 90.15    | 90.10    | 88.31 $\pm$ 0.13 | 88.05 $\pm$ 0.06 | <b>93.71 <math>\pm</math>0.09</b> | 70.58 $\pm$ 1.29 | 93.64 $\pm$ 0.01                  |
| Brightness        | 90.35    | 90.19    | 88.28 $\pm$ 0.09 | 88.35 $\pm$ 0.25 | <b>93.90 <math>\pm</math>0.06</b> | 64.40 $\pm$ 2.69 | 93.83 $\pm$ 0.05                  |
| Contrast          | 89.52    | 89.33    | 87.98 $\pm$ 0.09 | 87.93 $\pm$ 0.08 | <b>93.61 <math>\pm</math>0.05</b> | 53.60 $\pm$ 3.80 | <b>93.61 <math>\pm</math>0.03</b> |
| Elastic transform | 82.46    | 82.57    | 83.29 $\pm$ 0.17 | 83.28 $\pm$ 0.27 | <b>90.55 <math>\pm</math>0.09</b> | 39.92 $\pm$ 1.52 | 90.33 $\pm$ 0.06                  |
| Pixelate          | 87.27    | 87.15    | 85.79 $\pm$ 0.12 | 85.81 $\pm$ 0.17 | 92.24 $\pm$ 0.01                  | 36.04 $\pm$ 3.47 | <b>92.74 <math>\pm</math>0.04</b> |
| JPEG compression  | 82.03    | 81.73    | 79.72 $\pm$ 0.10 | 79.82 $\pm$ 0.14 | 86.86 $\pm$ 0.08                  | 30.90 $\pm$ 1.18 | <b>90.90 <math>\pm</math>0.01</b> |
| Average           | 80.96    | 80.82    | 83.17            | 83.17            | 89.81                             | 69.41            | <b>91.00</b>                      |

Table 4. Accuracy (%) on CIFAR-10-C dataset with Level 1 corruption for ClusT3-15 compared to ResNet50, LAME, PTBN, TENT, TTT, and TTT++.

| Iterations    | Layers |              |       |       |       |       |       |       |
|---------------|--------|--------------|-------|-------|-------|-------|-------|-------|
|               | 1      | 2            | 3     | 4     | 1, 2  | 2, 3  | 3, 4  | All   |
| No adaptation | 45.31  | 45.57        | 45.67 | 47.09 | 45.66 | 44.27 | 38.17 | 42.89 |
| 1             | 49.07  | 48.73        | 48.96 | 52.96 | 50.13 | 47.85 | 49.35 | 48.16 |
| 3             | 52.53  | 54.31        | 53.99 | 56.23 | 52.18 | 54.7  | 55.57 | 54.23 |
| 10            | 57.67  | 58.19        | 58.27 | 58.79 | 57.78 | 58.74 | 58.31 | 57.56 |
| 20            | 56.84  | <b>59.82</b> | 56.61 | 57.34 | 57.41 | 57.63 | 56.31 | 55.87 |

Table 5. Accuracy (%) values on VisDA-C with 1 normal projector on different layers.

| Iterations    | Layers |              |       |       |       |       |       |       |
|---------------|--------|--------------|-------|-------|-------|-------|-------|-------|
|               | 1      | 2            | 3     | 4     | 1, 2  | 2, 3  | 3, 4  | All   |
| No adaptation | 45.31  | 45.57        | 45.67 | 47.09 | 45.66 | 44.27 | 38.17 | 42.89 |
| 1             | 49.57  | 49.84        | 50.28 | 50.69 | 49.58 | 47.38 | 41.39 | 47.72 |
| 3             | 54.39  | 54.51        | 55.73 | 54.47 | 53.99 | 52.11 | 47.15 | 53.75 |
| 10            | 58.77  | 58.85        | 60.28 | 58.31 | 58.47 | 57.34 | 55.94 | 57.89 |
| 20            | 57.66  | <b>61.02</b> | 58.43 | 57.17 | 56.83 | 56.52 | 56.31 | 55.87 |

Table 6. Accuracy (%) values on VisDA-C with 5 normal projectors on different layers.

| Iterations    | Layers       |       |       |       |       |       |       |       |
|---------------|--------------|-------|-------|-------|-------|-------|-------|-------|
|               | 1            | 2     | 3     | 4     | 1, 2  | 2, 3  | 3, 4  | All   |
| No adaptation | 46.51        | 46.02 | 44.69 | 45.97 | 44.22 | 46.02 | 43.2  | 41.05 |
| 1             | 49.28        | 50.31 | 49.38 | 50.38 | 48.43 | 50.35 | 46.19 | 44.25 |
| 3             | 54.79        | 55.69 | 55.31 | 55.19 | 53.34 | 55.71 | 51.35 | 44.19 |
| 10            | 61.13        | 60.93 | 60.61 | 59.6  | 59.62 | 60.78 | 59.09 | 59.06 |
| 15            | <b>61.53</b> | 61.16 | 60.59 | 59.97 | 60.37 | 60.55 | 59.82 | 59.97 |
| 20            | 61.33        | 60.86 | 59.92 | 59.8  | 60.22 | 59.89 | 59.73 | 58.98 |

Table 7. Accuracy (%) values on VisDA-C with 10 normal projectors on different layers.

| Iterations    | Layers |              |       |       |       |       |       |       |
|---------------|--------|--------------|-------|-------|-------|-------|-------|-------|
|               | 1      | 2            | 3     | 4     | 1, 2  | 2, 3  | 3, 4  | All   |
| No adaptation | 43.91  | 46.41        | 46    | 42.46 | 46.54 | 45.45 | 44.27 | 44.09 |
| 1             | 48.28  | 51.79        | 49.82 | 45.96 | 51.06 | 49.23 | 49.41 | 49.36 |
| 3             | 54.23  | 56.72        | 54.24 | 51.62 | 56.6  | 54.36 | 54.89 | 49.43 |
| 10            | 60.04  | 61.72        | 59.16 | 59.56 | 60.93 | 60.64 | 61.12 | 60.18 |
| 15            | 60.25  | <b>61.93</b> | 59.44 | 60.16 | 60.81 | 60.91 | 61.64 | 60.27 |
| 20            | 59.98  | 61.57        | 59.14 | 59.88 | 60.31 | 60.72 | 61.16 | 59.92 |

Table 8. Accuracy (%) values on VisDA-C with 1 Large projector on different layers.

| Iterations    | Layers |       |       |       |       |       |       |              |
|---------------|--------|-------|-------|-------|-------|-------|-------|--------------|
|               | 1      | 2     | 3     | 4     | 1, 2  | 2, 3  | 3, 4  | All          |
| No adaptation | 46.57  | 44.66 | 46.01 | 43.86 | 45.21 | 46.37 | 46.58 | 46.81        |
| 1             | 50.67  | 47.68 | 50.16 | 48.61 | 49.70 | 49.46 | 49.46 | 52.34        |
| 3             | 56.18  | 52.77 | 54.90 | 54.27 | 54.65 | 52.88 | 53.43 | 52.29        |
| 10            | 61.45  | 61.03 | 59.87 | 60.51 | 59.57 | 59.95 | 58.12 | <b>61.69</b> |
| 15            | 61.48  | 61.54 | 60.40 | 60.96 | 60.16 | 61.44 | 58.83 | 61.51        |
| 20            | 60.91  | 60.90 | 59.81 | 60.49 | 59.83 | 59.30 | 58.69 | 60.66        |

Table 9. Accuracy (%) values on VisDA-C with 5 Large projectors on different layers.
